# Oesophageal seal of the novel supralaryngeal airway device I-Gel™ in comparison with the laryngeal mask airways Classic™ and ProSeal™ using a cadaver model

W. Schmidbauer<sup>1\*</sup>, S. Bercker<sup>2</sup>, T. Volk<sup>3</sup>, G. Bogusch<sup>4</sup>, G. Mager<sup>1</sup> and T. Kerner<sup>3</sup>

<sup>1</sup>Department of Emergency Medicine, Bundeswehrkrankenhaus, Berlin, Germany. <sup>2</sup>Department of Anaesthesiology and Intensive Care Medicine, Leipzig University Hospital, Leipzig, Germany. <sup>3</sup>Department of Anaesthesiology and Intensive Care Medicine, Charité-Universitätsmedizin Campus Virchow-Klinikum and Campus Charité Mitte, Berlin, Germany. <sup>4</sup>Center for Anatomy, Charité-Universitätsmedizin, Berlin, Germany

\*Corresponding author. E-mail: willischmidbauer@bundeswehr.org

**Background.** Supraglottic airway devices are increasingly used in anaesthesia and emergency medicine. This study was designed to investigate the oesophageal seal of the novel supralaryngeal airway device, I-Gel™ (I-Gel), in comparison with two of the laryngeal mask airways, Classic™ (cLMA) and ProSeal™ (pLMA), in a model of elevated oesophageal pressure.

**Methods.** The three supralaryngeal airway devices were inserted into eight unfixed cadaver models with exposed oesophagi that had been connected to a water column producing both a slow and a fast oesophageal pressure increase. The pressure applied until the loss of oesophageal seal during a slow and fast pressure increase was measured.

**Results.** During the slow increase of pressure, the pLMA withstood an oesophageal pressure up to a median of 58 cm H<sub>2</sub>O, while the cLMA was able to block the oesophagus up to a median of 37 cm H<sub>2</sub>O, and I-Gel already lost its seal at 13 cm H<sub>2</sub>O. One minute after maximum pressure had been applied, the pLMA withstood an oesophageal pressure of 59 cm H<sub>2</sub>O, the cLMA of 46 cm H<sub>2</sub>O, and I-Gel airway of 21 cm H<sub>2</sub>O. A fast release of oesophageal fluid was accomplished through the oesophageal lumen of both the pLMA and I-Gel.

**Conclusions.** Both the pLMA and cLMA provided a better seal of the oesophagus than the novel I-Gel airway. The pLMA and I-Gel drain off gastrointestinal fluid fast through the oesophageal lumen. Thus, tracheal aspiration may be prevented with their use. Further study is necessary.

*Br J Anaesth* 2009; **102**: 135–9

**Keywords:** airway; airway, anatomy; airway, apparatus; complications, aspiration; intubation, laryngeal mask; respiratory, upper airway; safety

Accepted for publication: October 11, 2008

Supralaryngeal airway devices are increasingly used in patients who are traditionally assumed to be at an increased risk for aspiration. In addition to the use for planned anaesthesia,<sup>1</sup> current guidelines also recommend supralaryngeal airway devices as an alternative to tracheal intubation during cardiopulmonary resuscitation.<sup>2</sup> Currently, the classical supralaryngeal airway devices have been refined and various alternatives have been introduced into clinical practice. One of them is the novel I-Gel™ airway device (I-Gel; Intersurgical, Berkshire, UK) which, in contrast to the classical laryngeal mask airway, is equipped with a gel-like cuff made of thermoplastic

elastomer. It seals the laryngo-pharyngeal space without any air being insufflated and additionally has an oesophageal lumen.<sup>3</sup> Using a cadaver model, our group showed that there are some major differences between the individual supralaryngeal airway devices regarding sealing capabilities during simulated oesophageal pressure increases.<sup>4</sup> It can be assumed that airway devices that offer an especially good seal and that are equipped with an additional oesophageal lumen are superior for use in patients with an increased risk of aspiration. As the cuff which is relevant to seal was modified during the development of the I-Gel airway device, this study was designed

to investigate oesophageal seal of the I-Gel, as compared with the two laryngeal mask airways LMA Classic™ (cLMA; LMA, Windhagen, Germany) and LMA ProSeal™ (pLMA; LMA, Windhagen, Germany) using a cadaver model.

## Methods

### Cadaver model

The study was approved by the ethical committee of Charité, Universitätsmedizin, Berlin.

Tracheas and oesophagi of eight unfixed human cadavers (head–neck preparations) were dissected. The distal end of the exposed oesophagi was connected to a vertical flexible hose with a diameter of 2 cm, using a tight suture. By filling the flexible hose with water, an oesophageal pressure increase was simulated. The trachea was connected to a test lung for respirators (Dräger, Lübeck, Germany).

See Table 1 for age, sex, height, and weight of the donors.

The laryngeal mask airways such as cLMA, pLMA, and I-Gel airway were inserted by the same experienced anaesthetist (>1000 laryngeal mask uses) with the cuffs of cLMA and pLMA being blocked in accordance with the manufacturer's instructions (size 4: 30 ml/size 5: 40 ml). The inspiration pressure was measured using a manometer (Dräger, Lübeck, Germany). Subsequently, a functional check of the anatomical position was performed. A pressure of 20 mbar was applied through a respiration bag. A correct position was postulated when no air leak escaped during this manoeuvre and the pressure was maintained. When this did not occur, the position was corrected until the required conditions were met. Additionally, the correct position was checked through the respiratory lumen by means of fiberoptic pharyngoscopy (Brochoscope BF Type 1T40, Olympus, Tokyo, Japan). The position was evaluated according to per cent of glottic opening (POGO) scale:<sup>5</sup> 1, glottis fully visible; 2, >50%

of glottis visible; 3, <50% of glottis visible; 4, glottis not visible. As a last step, the correct position of the oesophageal point of the pLMA and I-Gel was verified by inserting a gastric tube through the oesophageal lumen and moving it forward until it became visible at the oesophagi end. For the duration of the tests, the respective airway device was fastened to the face. To prevent the cadaver models from cooling, the tests were carried out at a room temperature of 32°C, with the water of the water column being heated to a temperature of 37°C.

### Investigation of the oesophageal seal

#### Test 1: slow increase of oesophageal pressure

After placing the airway device, a water column was generated by slowly filling the flexible hose connected vertically to the oesophagus. The pressure was increased by filling an additional 5 cm of water every 10 s to a maximum level of 130 cm H<sub>2</sub>O. Loss of seal was defined as the pressure at which the column height ceased to increase, with fluid being detected in the lumen of the airway device by fiberoptic means at the same time.

#### Test 2: fast increase of oesophageal pressure (simulated vomiting procedure)

The water column was filled up to 130 cm H<sub>2</sub>O while the lower end of the flexible hose connected to the oesophagus was clamped. The clamp was opened so that immediately after removing the clamp, an oesophageal pressure of 130 cm H<sub>2</sub>O was applied to the cuff, gel pad or both of the airway devices. In case of a leakage, the water column decreased correspondingly. The level of the water column 1 min after removing the clamp was registered as the seal. This test was conducted using the pLMA and I-Gel, both with the oesophageal drainage lumen open and closed.

Tests 1 and 2 were conducted 10 times for every airway device in each cadaver model in a randomized order, using random numbers produced by a statistical software (Microsoft Excel). For statistical analysis, the median of the respective series of tests was used.

**Table 1** Outline of sex, age, height, weight, and fiberoptic POGO score (per cent of glottic opening) of the eight cadaver models including the required sizes of the airways. Fiberoptic score: 1, glottis fully visible; 2, >50% of glottis visible; 3, <50% of glottis visible; 4, glottis not visible; pLMA, laryngeal mask airway LMA ProSeal™; cLMA, laryngeal mask airway LMA Classic™

| Cadaver model | Sex    | Age (yr) | Height (cm) | Weight (kg) | POGO score |      |       | Size |      |       |
|---------------|--------|----------|-------------|-------------|------------|------|-------|------|------|-------|
|               |        |          |             |             | cLMA       | pLMA | I-Gel | cLMA | pLMA | I-Gel |
| 1             | Female | 84       | 162         | 84          | 1          | 1    | 1     | 5    | 5    | 4     |
| 2             | Female | 78       | 158         | 60          | 1          | 1    | 1     | 4    | 4    | 4     |
| 3             | Male   | 78       | 164         | 68          | 1          | 1    | 2     | 4    | 4    | 4     |
| 4             | Male   | 67       | 171         | 84          | 1          | 1    | 1     | 5    | 5    | 4     |
| 5             | Female | 78       | 164         | 70          | 1          | 1    | 1     | 4    | 4    | 4     |
| 6             | Female | 82       | 160         | 69          | 1          | 1    | 1     | 4    | 4    | 4     |
| 7             | Male   | 73       | 169         | 73          | 3          | 2    | 3     | 4    | 4    | 4     |
| 8             | Female | 78       | 174         | 100         | 2          | 1    | 2     | 5    | 5    | 4     |

### Statistics

The data were checked for normal distribution using the Kolmogorov–Smirnov test before being checked for significant differences in more than two independent samples using the Kruskal–Wallis test. Using the Mann–Whitney *U*-test, a *post hoc* analysis was conducted in which the I-Gel was compared with the cLMA and pLMA, and the cLMA was compared with the pLMA.  $P < 0.05$  was considered as significant. All statistic procedures were conducted using SPSS™ 10.0 (SPSS, Chicago, IL, USA). If not otherwise stated, data are given in median (25th percentile; 75th percentile).

## Results

### Insertion and check of correct position

All three supralaryngeal airway devices could be inserted into all eight cadaver models as described earlier. As a result of the functional check for the correct position, both cLMA and pLMA had to be placed again in one case each, whereas the I-Gel had to be placed again in two patients. After that, the functional check could be conducted successfully in all patients. The results of the tests conducted using fiberoptic technique are shown in Table 1.

The Kruskal–Wallis test revealed significant differences for both tests 1 and 2.

### Test 1: slow increase of oesophageal pressure

During the slow increase of pressure, the pLMA withstood an oesophageal pressure to a median of 58 cm H<sub>2</sub>O (32; 64), while the cLMA was able to block the oesophagus only up to a median of 37 cm H<sub>2</sub>O (25; 43), and the I-Gel already lost its seal at a median of 13 cm H<sub>2</sub>O (12; 22). In the *post hoc* analysis, a significant difference could be noticed between cLMA vs I-Gel ( $P < 0.001$ ), pLMA vs I-Gel ( $P < 0.001$ ), and cLMA vs pLMA ( $P = 0.001$ ) (Fig. 1).

### Test 2: fast increase of oesophageal pressure (simulated vomiting procedure)

One minute after opening the clamp, there was a resulting water column of 59 (55; 61) cm H<sub>2</sub>O for the pLMA, of 46 (36; 50) cm H<sub>2</sub>O for cLMA, and of 21 (16; 26) cm H<sub>2</sub>O for I-Gel airway (Fig. 2). In the *post hoc* analysis, a significant difference could be noticed between the cLMA and the I-Gel ( $P = 0.003$ ) and between the pLMA and the I-Gel ( $P = 0.001$ ). The difference between the pLMA and the cLMA did not reach significance ( $P = 0.13$ ). During Test 2 with the oesophageal lumen of the pLMA and the I-Gel opened, the entire oesophageal liquid was drained to the outside without any tracheal aspiration occurring.

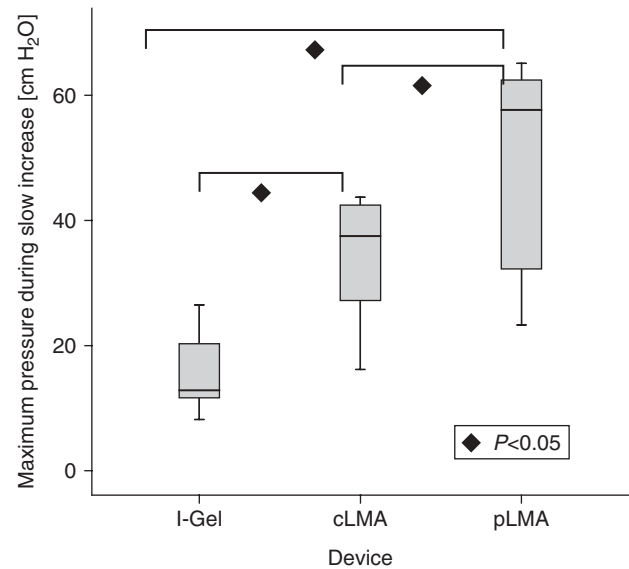

**Fig 1** Results of Test 1. The maximum oesophageal pressures achieved during a slow pressure increase before the occurrence of a leakage are depicted as a box plot indicating the median, 5, 25, 75, and 95% quantiles for the LMA Classic™ (cLMA), ProSeal™ (pLMA), and I-Gel airway.

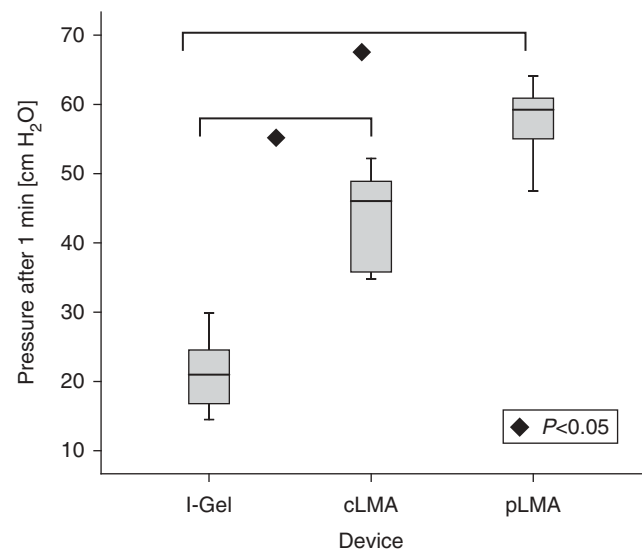

**Fig 2** Results of Test 2. The oesophageal pressures remaining 1 min after maximum pressure had been applied to LMA Classic™ (cLMA), ProSeal™ (pLMA) and I-Gel airway are depicted as a box plot indicating the median, 5, 25, 75, and 95% quantiles.

## Discussion

This study was performed to investigate the oesophageal seal of the novel airway device I-Gel in comparison with the established laryngeal mask airways cLMA and pLMA. Our results demonstrate that the cLMA and pLMA can withstand a significantly higher oesophageal pressure than the I-Gel airway when using a cadaver model. Independent of this finding, the pLMA and the I-Gel

permitted a fast and complete drainage of oesophageal fluid through their open oesophageal lumens.

The assessment of the risk of aspiration when using supralaryngeal airway devices is impeded by methodological problems. Aspiration during elective operations generally occurs very rarely so that the definite risk of different procedures cannot be precisely evaluated in clinical studies. As the risk of aspiration seems to be increased in pre-hospital use, the problem has been mainly addressed during pre-hospital investigations. Tanigawa and colleagues,<sup>6</sup> for example, detected six cases of aspiration in 2701 resuscitations conducted using the cLMA. Apart from an at least theoretically reduced protection that supralaryngeal airway devices provide when compared with tracheal intubation, they offer advantages such as the fact that they are easier to handle and learning how to use them is easier, as a result of which their use also in pre-hospital settings continues to be evaluated.

Concerning the risk of aspiration, the use of the laryngeal mask airway seems to be superior at least to the classical mask ventilation. Stone and colleagues<sup>7</sup> described a significant difference in terms of clinically relevant aspirations that occurred when using a laryngeal mask airway compared with bag valve mask ventilation (3.5% vs 12.4%).<sup>7</sup> Moreover, several case reports on vomiting, regurgitation, or both during the use of supralaryngeal airway devices have been published. The use of airway devices equipped with an additional oesophageal lumen often prevents tracheal aspiration of gastric contents.<sup>8–11</sup>

The difficulties described that occurred when assessing the risk of aspiration led to an evaluation of the risk of aspiration and the seal of supralaryngeal airway devices using cadaver models. By means of the cadaver model presented here, our group could show significant differences in sealing properties of supralaryngeal airway devices (cLMA, pLMA, Intubating Laryngeal Mask Airway Fastrach<sup>TM</sup>, Laryngeal Tube<sup>TM</sup>, Laryngeal Tube LTS II<sup>TM</sup>, Combitube<sup>TM</sup>, and Easytube<sup>TM</sup>). The Combitube<sup>TM</sup>, Easytube<sup>TM</sup>, and Intubating Laryngeal Mask Airway Fastrach<sup>TM</sup> provided the most effective seal against oesophageal pressures up to 130 cm H<sub>2</sub>O. The results obtained by the cLMA and pLMA yielded in this context were similar to those in the present study.<sup>4</sup> During other investigations using cadaver models in which the oesophageal pressure was continuously increased using not a water column but a pump, comparable differences could also be described for the cLMA and pLMA.<sup>12–13</sup> To the best of our knowledge, systematic investigation of the sealing efficiency with the I-Gel airway device has not been reported yet. Thus far, only a case series has been published describing the two cases of regurgitation with successful drainage through the oesophageal lumen and one aspiration with insufficient drainage out of a total of 280 patients.<sup>14</sup> This clinical experience regarding risk of aspiration by lacking, inadequate, or both oesophageal drainage corresponds to our findings.

As this is an experimental study, some limitations have to be taken into consideration when evaluating the results achieved. Unfixed human cadavers were used that do represent patient anatomy exactly, but cannot carry out possible swallowing and retching movements or respond to influences associated with respiration. The fact that some supralaryngeal airway devices are made of thermoplastic material may affect the study results because possible thermoplastic features that occur under the physiological body temperature are usually not considered appropriately. To avoid any distortion, measures were taken to prevent the cadaver models from cooling. The good seal of the larynx during ventilation in all cadavers may be an indication of the fact that the properties of the materials used apparently were not significantly affected by the test conditions. Although the design of the test is suited for making statements about the seal at clearly elevated oesophageal pressures, general recommendations for clinical use cannot be deduced from a cadaver setting.

To carry out the tests both with the oesophageal lumen open and closed in our view was useful. The lumens that are very narrow in both devices can easily be closed by viscous or solid gastric contents. Furthermore, the oesophageal seal can only be investigated with increased oesophageal pressures that could not be achieved with drainage through an open lumen.

Our results suggest that at elevated pressures, the oesophageal seal provided by the cuff of the laryngeal mask airway is superior to the oesophageal seal created by the pre-shaped plastic mask body of I-Gel airway. A possible reason might be that the forces that are responsible for the stabilization of supralaryngeal airway devices within the pharynx are different between I-Gel and cLMA and pLMA. These forces are described only for laryngeal mask airways thus far.<sup>15</sup> However, an optimal position of the airway device was the pre-requisite for conducting this investigation. Possibly, undesired changes of position after the insertion might be less likely using the I-Gel because of its special shape and the fact that no insufflation is required.<sup>16</sup> Additionally, our data suggest that when using the cadaver model ventilation that can be carried out well without any air leak is not necessarily a guarantor of a proper oesophageal seal. Apart from sealing, the safe and efficient use of supralaryngeal airway devices, especially in an emergency setting, may also depend on the ease of use, speed of insertion, the training and practice required, and also possible side-effects.<sup>17–21</sup>

In principal, supralaryngeal airway devices do not prevent aspiration as reliably as tracheal intubation does. Particularly in patients with an increased risk of aspiration, it should be carefully considered whether or not a supralaryngeal airway device is indicated. If the use of supralaryngeal airway device in these conditions is necessary, a device that is equipped with an inflatable cuff and an oesophageal lumen would be most suitable.

## Funding

The study was financed from resources of the German Medical Corps.

## References

- Natalini G, Lanza G, Rosano A, Dell'Agnolo P, Bernardini A. Standard laryngeal mask airway and LMA-ProSeal during laparoscopic surgery. *J Clin Anesth* 2003; **15**: 428–32
- Nolan JP, Deakin CD, Soar J, Bottiger BW, Smith G. European Resuscitation Council guidelines for resuscitation 2005. Section 4. Adult advanced life support. *Resuscitation* 2005; **67**: 39–86
- Gabott A, Beringer R. The igel supralaryngeal airway: a potential role for resuscitation? *Resuscitation* 2007; **73**: 161–2
- Bercker S, Schmidbauer W, Volk T, et al. Comparison of seal in seven supraglottic airway devices using a cadaver model of elevated esophageal pressure. *Anesth Analg* 2008; **106**: 445–8
- Levitan RM, Ochroch EA, Kush S, Shofer FS, Hollander JE. Assessment of airway visualization: validation of the percent of glottic opening (POGO) scale. *Acad Emerg Med* 1998; **5**: 919–23
- Tanigawa K, Shigematsu A. Choice of airway devices for 12,020 cases of nontraumatic cardiac arrest in Japan. *Prehosp Emerg Care* 1998; **2**: 96–100
- Stone BJ, Chantler PJ, Baskett PJ. The incidence of regurgitation during cardiopulmonary resuscitation: a comparison between the bag valve mask and laryngeal mask airway. *Resuscitation* 1998; **38**: 3–6
- Keller C, Brimacombe J, Bittersohl J, Lirk P, von Goedecke A. Aspiration and the laryngeal mask airway: three cases and a review of the literature. *Br J Anaesth* 2004; **93**: 579–82
- Mark DA. Protection from aspiration with the LMA-ProSeal after vomiting: a case report. *Can J Anaesth* 2003; **50**: 78–80
- Evans NR, Llewellyn RL, Gardner SV, James MF. Aspiration prevented by the ProSeal laryngeal mask airway: a case report. *Can J Anaesth* 2002; **49**: 413–16
- Brimacombe J, Keller C. Airway protection with the ProSeal laryngeal mask airway. *Anaesth Intensive Care* 2001; **29**: 288–91
- Keller C, Brimacombe J, Radler C, Puhlinger F. Do laryngeal mask airway devices attenuate liquid flow between the esophagus and pharynx? A randomized, controlled cadaver study. *Anesth Analg* 1999; **88**: 904–7
- Keller C, Brimacombe J, Kleinsasser A, Loeckinger A. Does the ProSeal laryngeal mask airway prevent aspiration of regurgitated fluid? *Anesth Analg* 2000; **91**: 1017–20
- Gibbison B, Cook TM, Seller C. Case series: protection from aspiration and failure of protection from aspiration with the i-gel airway. *Br J Anaesth* 2008; **100**: 415–17
- Miller MD. A proposed classification and scoring system for supraglottic sealing airways: a brief review. *Anesth Analg* 2004; **99**: 1553–9
- Levitan RM, Kinkle WC. Initial anatomic investigations of the I-gel airway: a novel supraglottic airway without inflatable cuff. *Anaesthesia* 2005; **60**: 1022–6
- Bein B, Carstensen S, Gleim M, et al. A comparison of the proSeal laryngeal mask airway, the laryngeal tube S and the esophageal–tracheal combitube during routine surgical procedures. *Eur J Anaesthesiol* 2005; **22**: 341–6
- Twigg S, Brown JM, Williams R. Swelling and cyanosis of the tongue associated with use of a laryngeal mask airway. *Anaesth Intensive Care* 2000; **28**: 449–50
- Stewart A, Lindsay WA. Bilateral hypoglossal nerve injury following the use of the laryngeal mask airway. *Anaesthesia* 2002; **57**: 264–5
- Lowinger D, Benjamin B, Gadd L. Recurrent laryngeal nerve injury caused by a laryngeal mask airway. *Anaesth Intensive Care* 1999; **27**: 202–5
- Gatward JJ, Thomas MJ, Nolan JP, Cook TM. Effect of chest compressions on the time taken to insert airway devices in a manikin. *Br J Anaesth* 2008; **100**: 351–6
